# Supplementary material for: Adenosine A2A Receptors Intrinsically Regulate CD8+ T Cells in the Tumor Microenvironment
Source: Oxford University Press journal article supplement (doi:10.1158/0008-5472.can-13-3581), 2014-10-23
Supplement: 00085472can133581-sup-124162_2_supp_2673336_ncdj7v.docx [file 00085472can133581-sup-124162_2_supp_2673336_ncdj7v.docx]

| **Target antigen** | **Fluorescent tag** | **Clone** | **Source** | **Dilutions** |
| --- | --- | --- | --- | --- |
| CD3 | PerCP-By5.5 | 145-2C11 | eBioscience | 1:400 |
| CD3 | PE | 145-2C11 | eBioscience | 1:400 |
| CD4 | PE-AF610 | RM4-5 | invitrogen | 1:400 |
| CD8 | APC-eFluor780 | 53-6.7 | eBioscience | 1:400 |
| CD8 | APC-AF750 | 53-6.7 | eBioscience | 1:400 |
| CD11b | PE-Cy7 | M1/70 | BD Pharmingen | 1:400 |
| CD11b | PE-Texas Red | M1/70 | invitrogen | 1:400 |
| CD11b | BV-711 | M1/70 | Biolegend | 1:400 |
| CD11c | BV-785 | N418 | Biolegend | 1:400 |
| CD80 | PE-Cy5 | 16-10A1 | eBioscience | 1:400 |
| CD86 | BV-650 | GL-1 | Biolegend | 1:400 |
| CD25 | BV-650 | PC61 | Biolegend | 1:400 |
| CD25 | APC | PC61.5 | eBioscience | 1:400 |
| CD25 | FITC | 7D4 | BD Biosciences | 1:400 |
| CD25 | PE-Cy5 | 7D4 | eBioscience | 1:400 |
| CD44 | AF700 | IM7 | eBioscience | 1:400 |
| CD44 | APC-eFluor780 | IM7 | eBioscience | 1:400 |
| CD45 | APC-Cy7 | 30-F11 | BD Biosciences | 1:400 |
| CD45 | AF700 | 30-F11 | eBioscience | 1:400 |
| CD45.1 | PE-Cy7 | A20 | Biolegend | 1:200 |
| CD45.2 | AF700 | 104 | Biolegend | 1:200 |
| CD127 | AF647 | A7R34 | Biolegend | 1:400 |
| CD127 | PE | A7R34 | eBioscience | 1:800 |
| CD127 | APC-AF780 | A7R34 | eBioscience | 1:200 |
| F4/80 | PE-TR | BM8 | invitrogen | 1:200 |
| Foxp3 | PE | FJK16s | eBioscience | 1:100 |
| GR1 | APC-Cy7 | RB6-8C5 | eBioscience | 1:400 |
| GR1 | eGlour450 | RB6-8C5 | eBioscience | 1:400 |
| KLRG1 | PerCP-eFlour710 | 2F1 | eBioscience | 1:400 |
| NK.1.1 | PE | PK136 | eBioscience | 1:400 |
| NK 1.1 | PE-Cy7 | PK136 | eBioscience | 1:400 |
| PD-1 | eFlour450 | RMP1-30 | eBioscience | 1:400 |
| TCRb | PE-Cy7 | H57-597 | eBioscience | 1:400 |
| TCRb | PE | H57-597 | eBioscience | 1:400 |
| TCRb | PB/eFluor450 | H57-597 | eBioscience | 1:400 |
| CD16/32 | purified | 93 | eBioscience | 1:100 |
